# Supplementary material
Source: publisher site journal article supplement (https://www.dovepress.com/article/314029)

Supplementary Figure: Distribution of all organisms identified from first positive cultures.

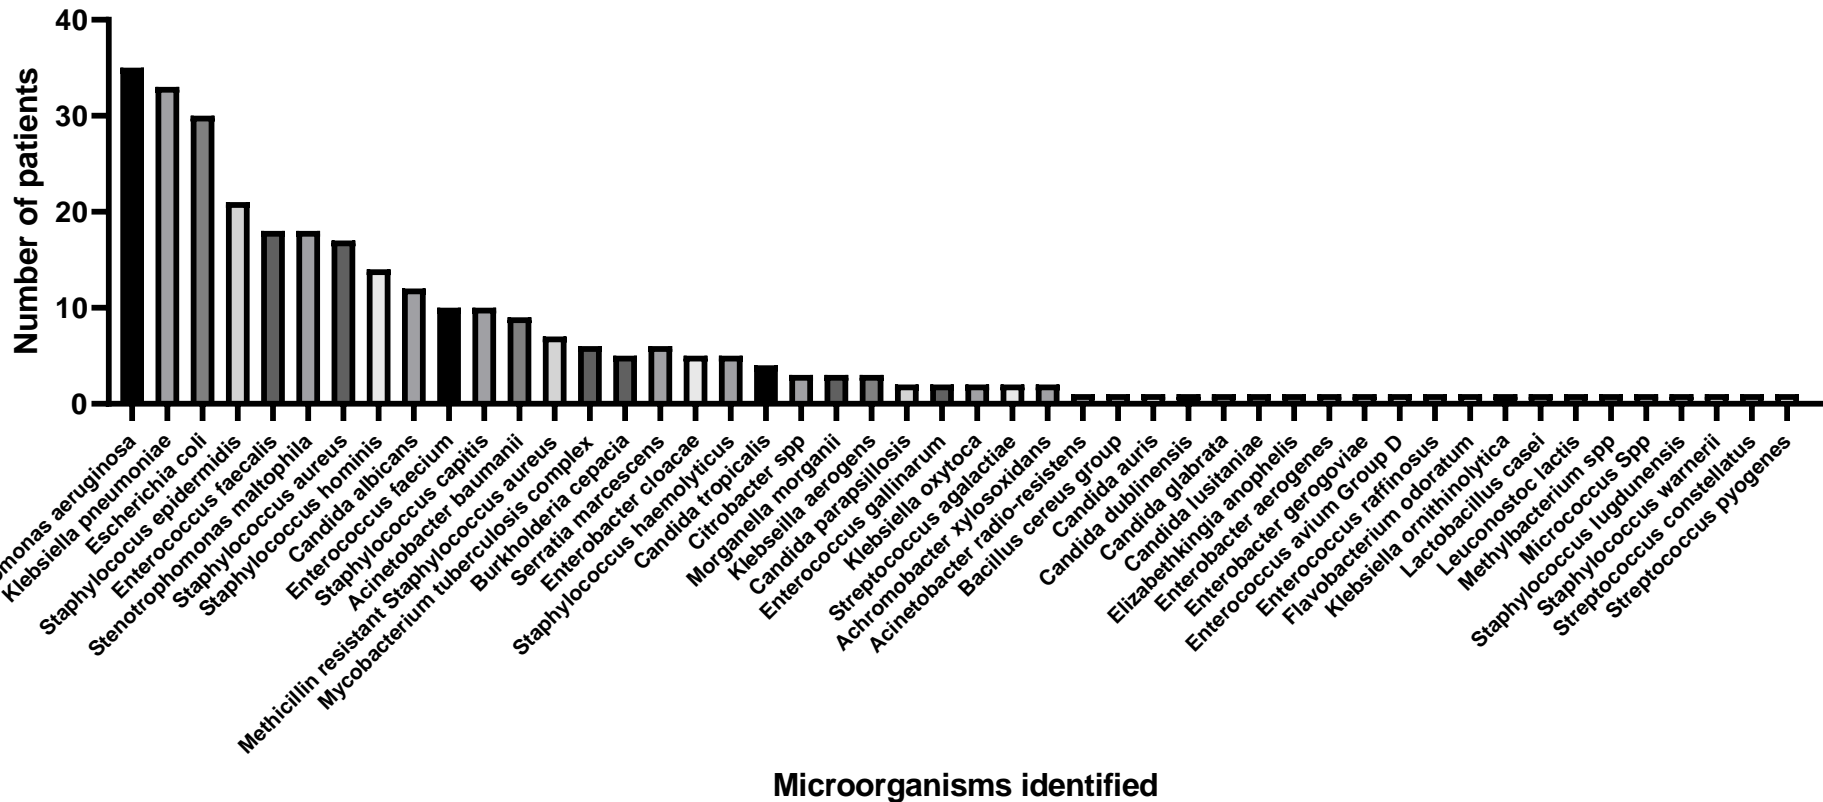

Supplement: Supplementary file 1 [file get_supplementary_file.php]
